# Supplementary figures and images for: Mimulus sRNAs Are Wound Responsive and Associated with Transgenerationally Plastic Genes but Rarely Both
Source: MDPI journal article supplement (doi:10.3390/ijms21207552), 2020-10-13

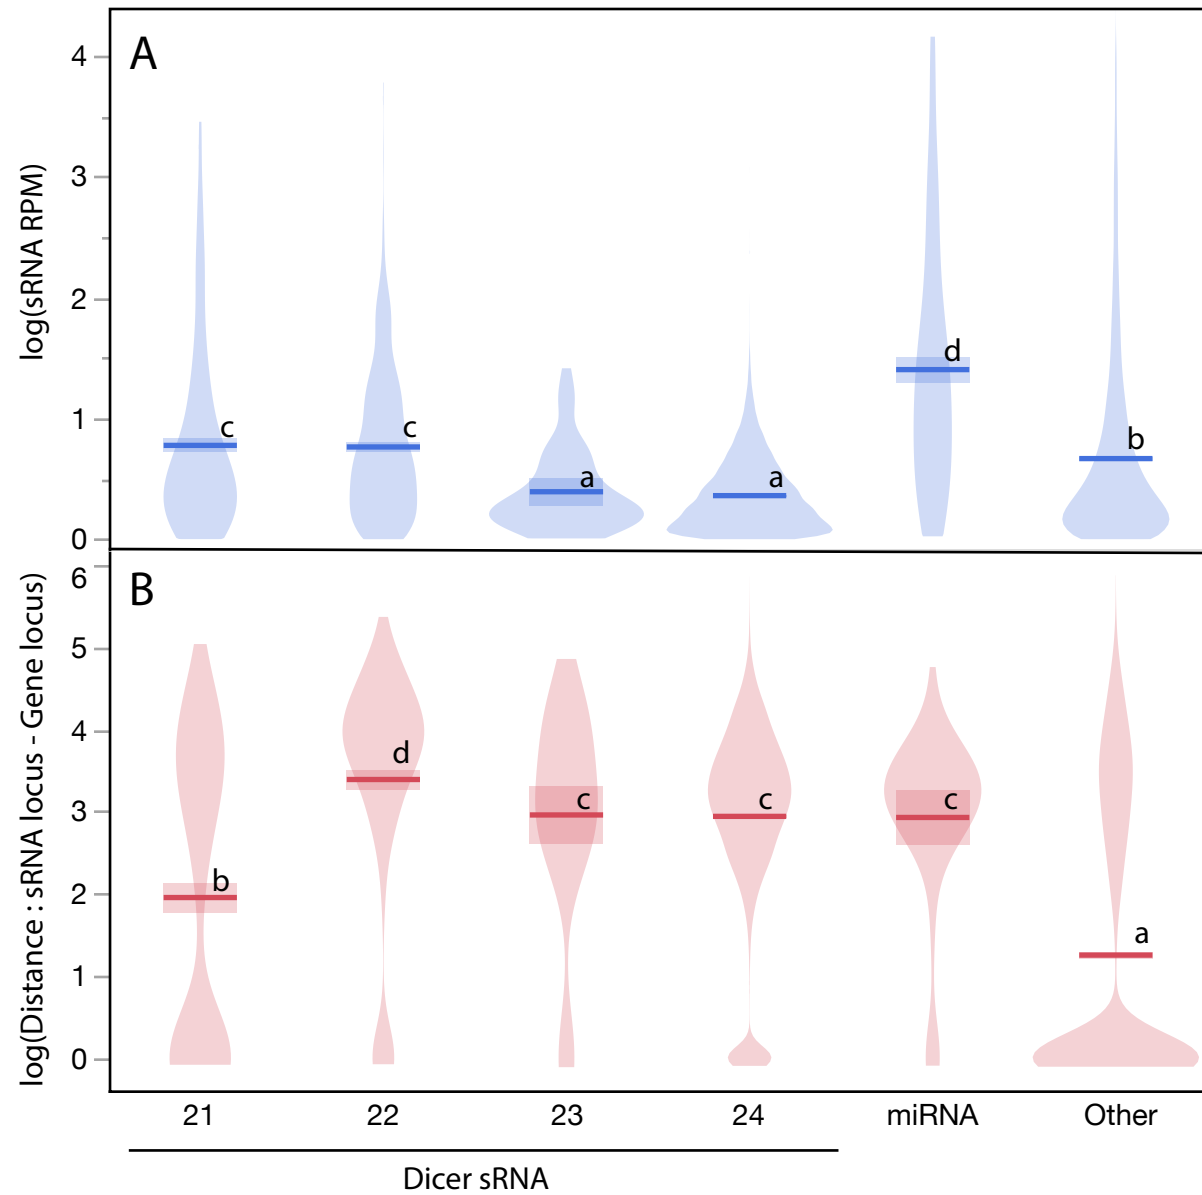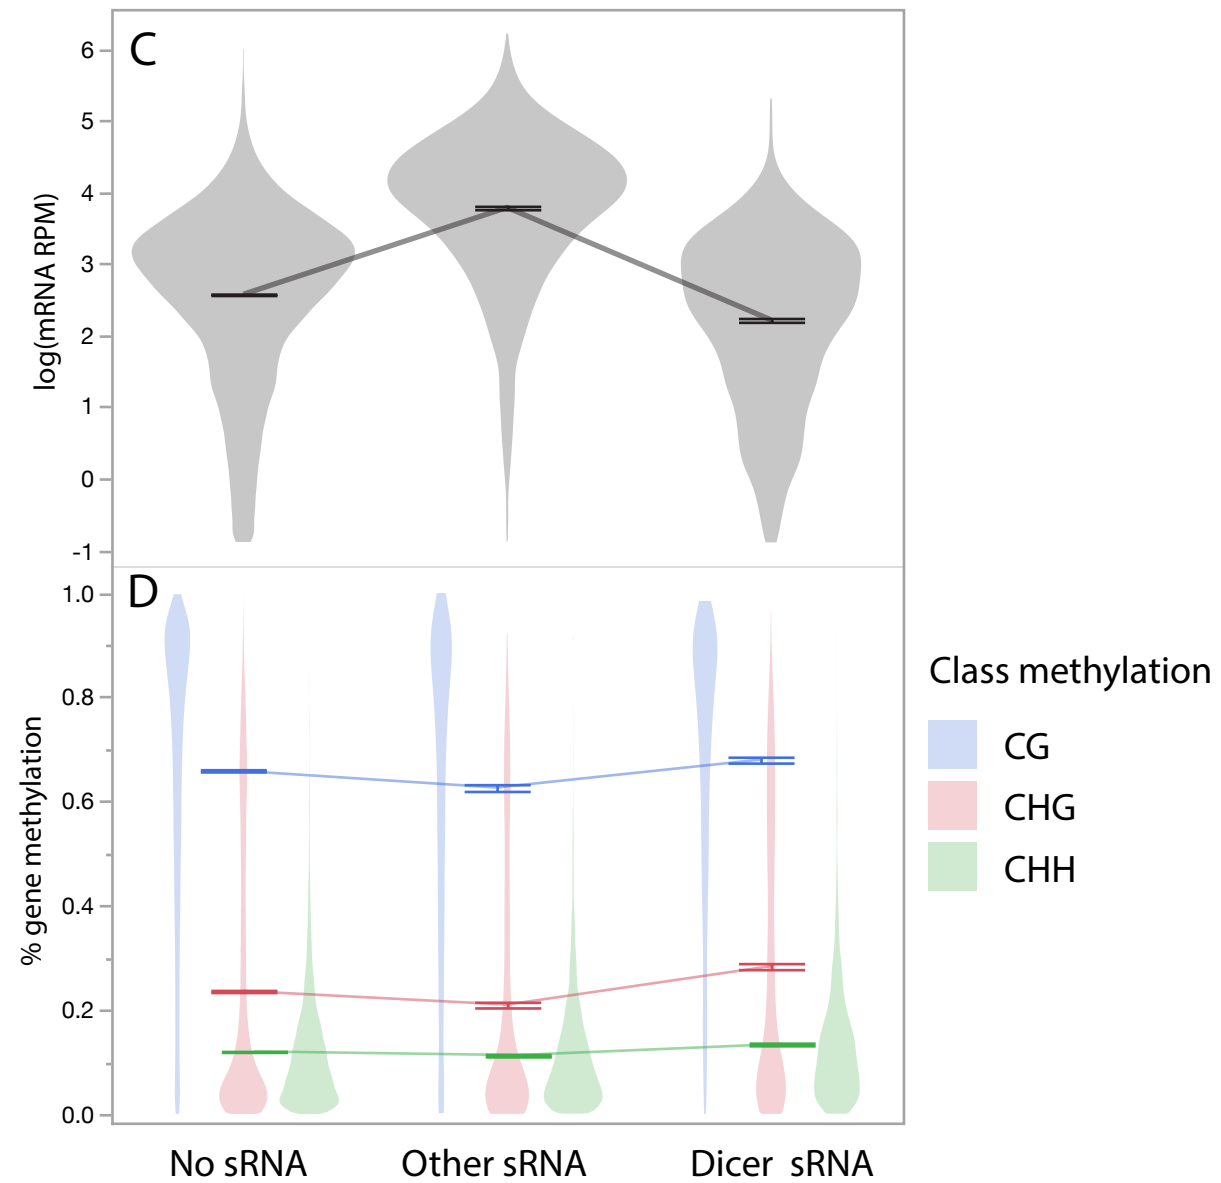

Supplement: s1 [file s1]
